# Supplementary material for: Validation of the Cloud_CCI cloud products in the Arctic
Source: Copernicus journal article supplement (doi:10.5194/amt-2022-312), 2023-01-30
Supplement: Supplementary file [file amt-2022-312-AC2-supplement.pdf]

**Response to the reviewer**

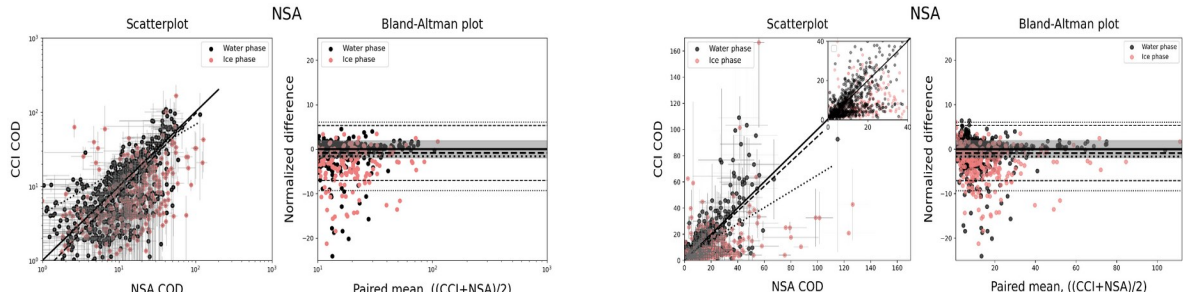

Fig 1) COD validation over NSA in log scale and normal scale

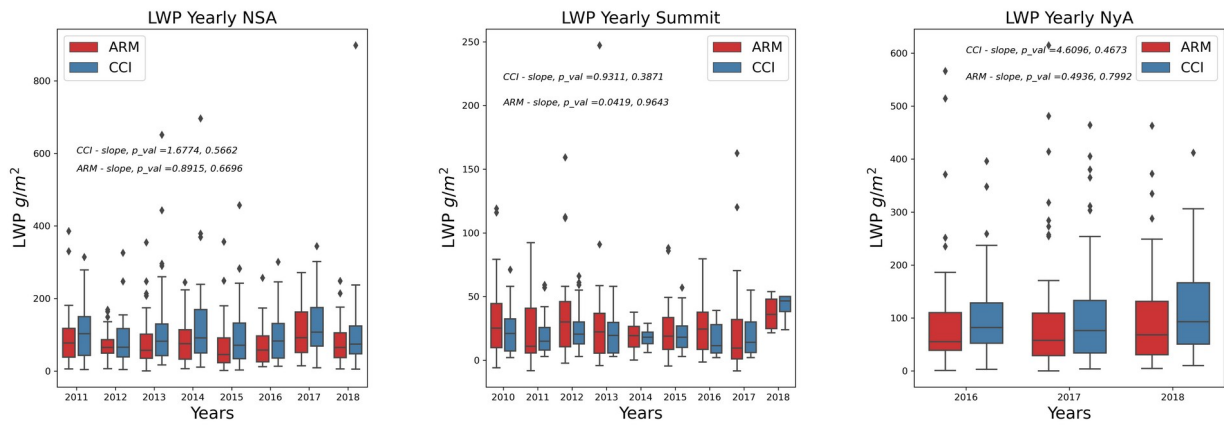

Fig 2) Temporal variations of LWP over NSA, Summit and Ny-Ålesund (NyA)

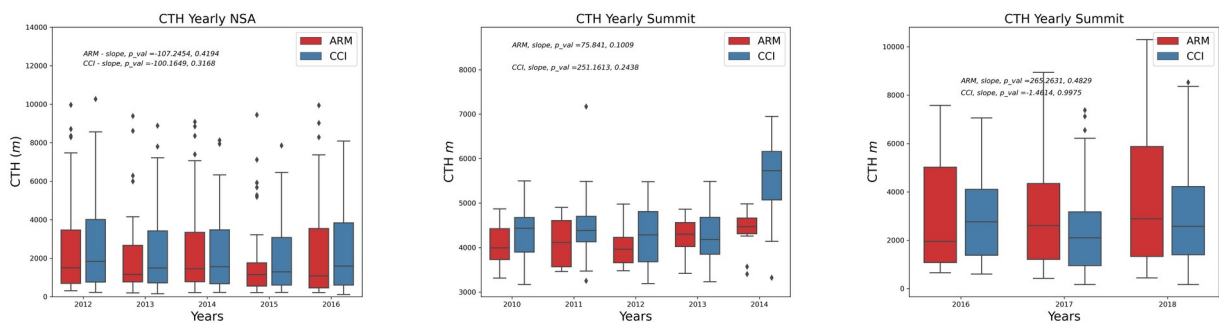

Fig 3) Temporal variations of CTH over NSA, Summit and Ny-Ålesund (NyA)

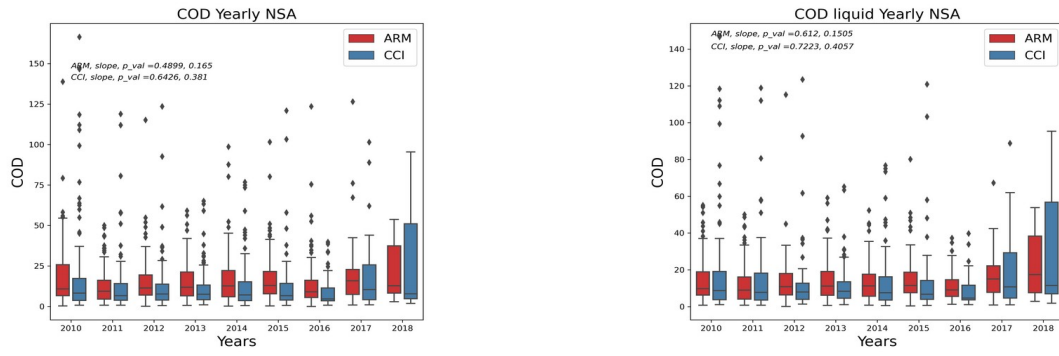

Fig 4) Temporal variations of COD (all cases) and COD (only liquid clouds) over NSA
